# Supplementary material for: Meat-Borne-Parasite: A Nanopore-Based Meta-Barcoding Workflow for Parasitic Microbiodiversity Assessment in the Wild Fauna of French Guiana
Source: Preprints.org preprint supplement (doi:10.20944/preprints202402.0662.v1), 2024-02-12
Supplement: Supplementary file 1 [file supplementary]

Appendix S1

**Figure S1. Nanopore and Illumina relative frequency at level 6*.*** The alignment identity of Nanopore sequencing reads to Silva database is shown. A dashed red line represents minimum identity threshold used for filtering hits.
